# Supplementary material for: Sonochemical synthesis of Ce1−xFexO2−δ (0 ≤x≤ 0.45) and Ce0.65Fe0.33Pd0.02O2−δ nanocrystallites: oxygen storage material, CO oxidation and water gas shift catalyst
Source: Royal Society of Chemistry journal article supplement (doi:10.1039/c0dt00480d), 2010-01-01
Supplement: c0dt00480d.pdf [file c0dt00480d.pdf]

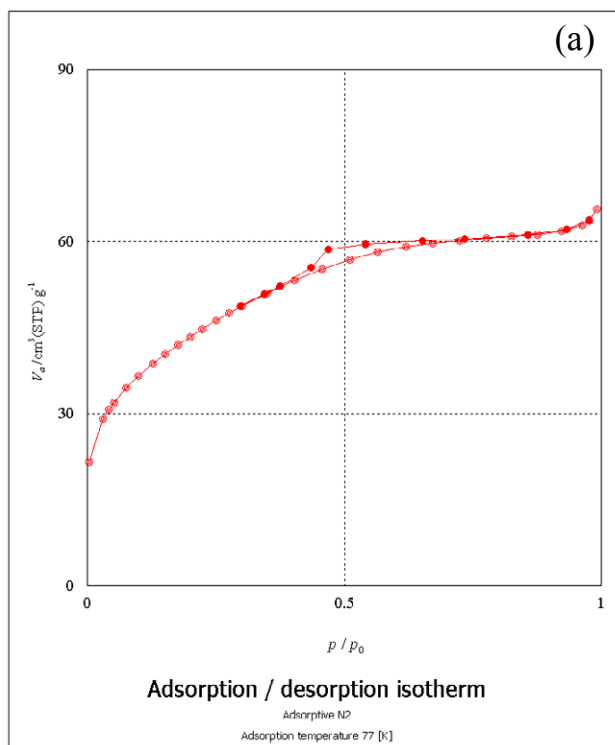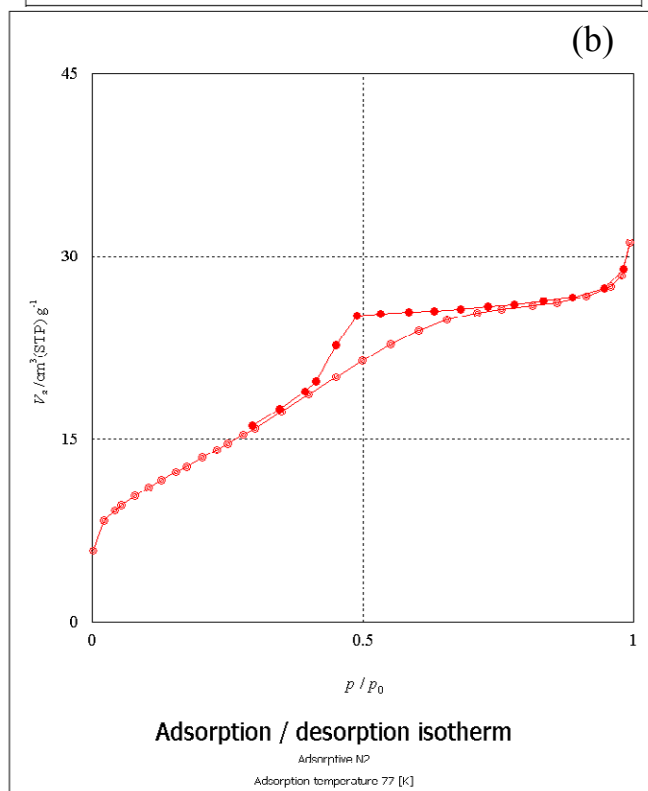

Supporting Figure S1. continued..

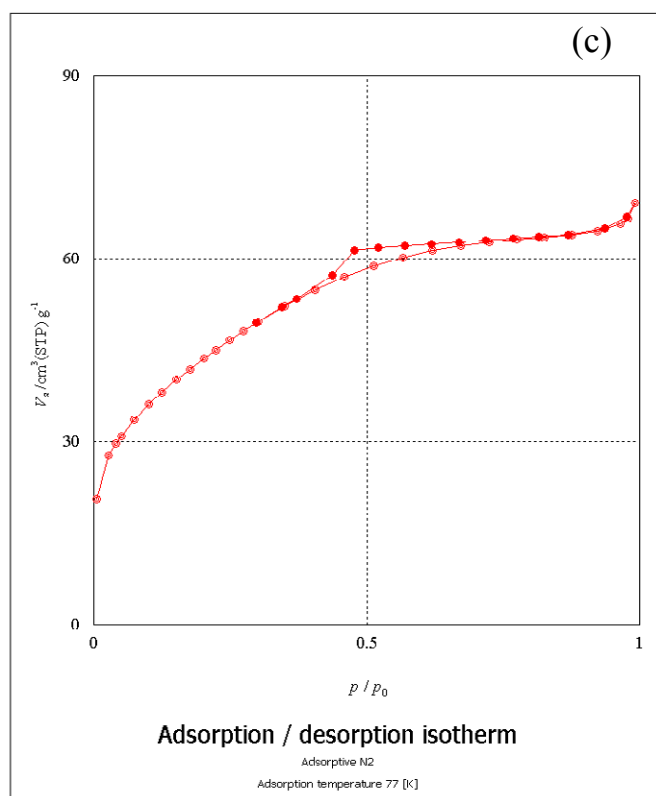

Supporting Figure S1. N<sub>2</sub> absorption/desorption plot for (a) as prepared Ce<sub>0.67</sub>Fe<sub>0.33</sub>O<sub>1.835</sub>, (b) Ce<sub>0.67</sub>Fe<sub>0.33</sub>O<sub>1.835</sub> heated at 600 °C for 10 h and (c) as prepared Ce<sub>0.67</sub>Fe<sub>0.33</sub>Pd<sub>0.02</sub>O<sub>1.815</sub>.

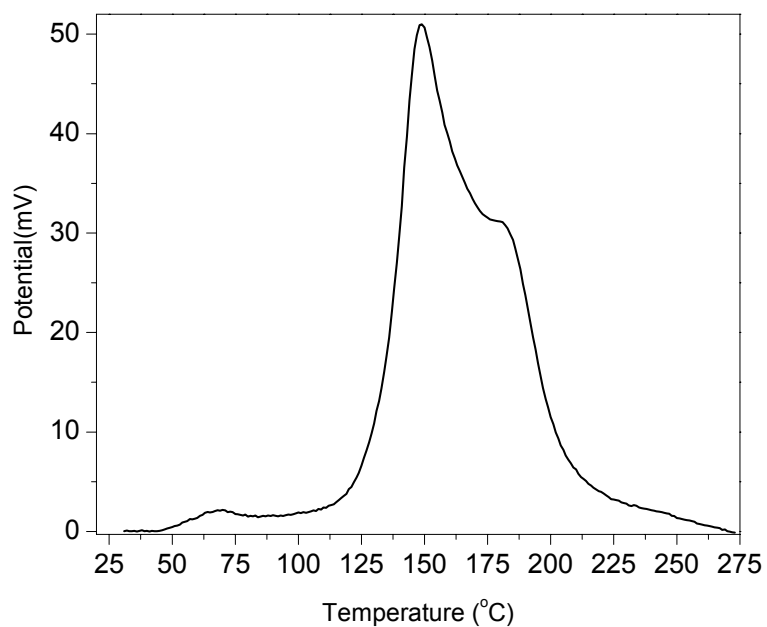

Supporting figure S2. H<sub>2</sub>/TPR profile of Ce<sub>0.67</sub>Fe<sub>0.33</sub>Pd<sub>0.02</sub>O<sub>1.815</sub> heated at 600 °C for 10 h.
